# Supplementary material for: Neonatal intensive care parent satisfaction: a multicenter study translating and validating the Italian EMPATHIC-N questionnaire
Source: Springer Nature journal article supplement (doi:10.1186/s13052-017-0439-8), 2018-01-05
Supplement: MOESM2 [file 15347334]

**Table S2.** Correlations among factors

| <b>Domains</b>            | <b>1.</b> | <b>2.</b> | <b>3.</b> | <b>4.</b> | <b>5.</b> |
|---------------------------|-----------|-----------|-----------|-----------|-----------|
| 1. Information            | -         |           |           |           |           |
| 2. Care & Treatment       | 89**      |           |           |           |           |
| 3. Parental Participation | 71**      | 82**      |           |           |           |
| 4. Organization           | 81**      | 88**      | 73**      |           |           |
| 5. Professional Attitude  | 83**      | 94**      | 80**      | 96**      | -         |

\*\*  $p < 0.01$
