# Supplementary material for: Neonatal intensive care parent satisfaction: a multicenter study translating and validating the Italian EMPATHIC-N questionnaire
Source: Ital J Pediatr. 2018 Jan 5;44:5. doi: 10.1186/s13052-017-0439-8 (PMC5756347; doi:10.1186/s13052-017-0439-8)
Supplement: Supplementary file 1 — Descriptive analysis levels of the 57 items and correlation with the general satisfaction of physicians and nurses. (PDF 145 kb) [file 13052_2017_439_MOESM1_ESM.pdf]

**Table S1.** Descriptive analysis levels of the 57 items and correlation with the general satisfaction of physicians and nurses.

| Items                                                                                                                | N   | Mean | SD   | Overall Satisfaction Physicians | Overall Satisfaction Nurses |
|----------------------------------------------------------------------------------------------------------------------|-----|------|------|---------------------------------|-----------------------------|
| <b>Q1</b> We had a daily meeting with physicians and nurses about the medication and the care of our child           | 161 | 5.43 | 1.09 | 0.34                            | 0.25                        |
| <b>Q2</b> Physicians and nurses answered our questions clearly                                                       | 161 | 5.59 | 0.90 | 0.31                            | 0.38                        |
| <b>Q3</b> The information given by physicians and nurses were consistent with each other                             | 159 | 5.30 | 1.19 | 0.29                            | 0.38                        |
| <b>Q4</b> We were immediately informed in case of worsening of our child health condition                            | 130 | 5.52 | 0.94 | 0.27                            | 0.45                        |
| <b>Q5</b> Physicians and nurses provided us clearly information about our child illness.                             | 144 | 5.61 | 0.85 | 0.42                            | 0.30                        |
| <b>Q6</b> Physicians clearly informed us about the consequences of the treatment that was administered to our child. | 146 | 5.54 | 0.98 | 0.25                            | 0.21                        |
| <b>Q7</b> Physicians and nurses gave us comprehensible reports about medical examinations and interventions.         | 153 | 5.45 | 0.97 | 0.30                            | 0.22                        |
| <b>Q8</b> Physicians and nurses gave us clear information about drug effects.                                        | 150 | 5.12 | 1.35 | 0.39                            | 0.27                        |
| <b>Q9</b> Physicians informed us about the prospects for our child future health.                                    | 153 | 4.93 | 1.38 | 0.18                            | 0.20                        |
| <b>Q10</b> The informative material that was provided included clear and complete written information.               | 117 | 5.28 | 1.19 | 0.25                            | 0.21                        |
| <b>Q11</b> The information that physicians and nurses gave us were very clear.                                       | 158 | 5.45 | 1.00 | 0.30                            | 0.39                        |
| <b>Q12</b> Physicians and nurses provided us truly and honest information.                                           | 158 | 5.75 | 0.67 | 0.28                            | 0.26                        |
| <b>Q13</b> Physician - nurse collaboration was good.                                                                 | 157 | 5.73 | 0.63 | 0.38                            | 0.40                        |
| <b>Q14</b> The staff paid attention to prevention and pain care of our child.                                        | 151 | 5.60 | 0.72 | 0.31                            | 0.34                        |
| <b>Q15</b> Physicians and nurses are familiar with their work. They know what to do.                                 | 157 | 5.82 | 0.42 | 0.26                            | 0.38                        |
| <b>Q16</b> The proper medication was always administered promptly.                                                   | 127 | 5.43 | 1.01 | 0.30                            | 0.35                        |
| <b>Q17</b> Physicians and nurses were aware about our child clinical history.                                        | 158 | 5.48 | 0.96 | 0.31                            | 0.49                        |
| <b>Q18</b> Physicians and nurses paid attention to our child development stage.                                      | 155 | 5.59 | 0.80 | 0.35                            | 0.45                        |
| <b>Q19</b> Physicians and nurses took promptly actions in case of worsening of our child clinical condition.         | 131 | 5.73 | 0.56 | 0.38                            | 0.36                        |
| <b>Q20</b> Our child needs were efficiently met.                                                                     | 154 | 5.60 | 0.71 | 0.30                            | 0.51                        |
| <b>Q21</b> The health staff worked to achieve a common objective: the best care and treatment for our child and us.  | 157 | 5.63 | 0.78 | 0.29                            | 0.48                        |
| <b>Q22</b> Physicians and nurses cared about our child well-being.                                                   | 157 | 5.73 | 0.52 | 0.38                            | 0.36                        |
| <b>Q23</b> We were daily informed about the physicians and the nurses who were in charge of our child.               | 155 | 4.57 | 1.69 | 0.37                            | 0.38                        |
| <b>Q24</b> Physicians and nurses emotionally supported us in an appropriate manner.                                  | 154 | 5.16 | 1.30 | 0.36                            | 0.47                        |
| <b>Q25</b> Physicians and nurses well met our needs.                                                                 | 157 | 5.39 | 0.99 | 0.34                            | 0.52                        |
| <b>Q26</b> The health staff took care of our child and us.                                                           | 158 | 5.58 | 0.72 | 0.37                            | 0.42                        |
| <b>Q27</b> A nurse has always supported us in case of emergency.                                                     | 120 | 5.33 | 1.18 | 0.35                            | 0.34                        |
| <b>Q28</b> Nurses always cared about our child clearness/hygiene and that he/she was comfortable into the incubator. | 160 | 5.64 | 0.89 | 0.33                            | 0.47                        |
| <b>Q29</b> The handover between NICU and other wards health staff took properly place.                               | 121 | 5.53 | 0.91 | 0.38                            | 0.19*                       |

|            |                                                                                             |     |      |      |       |       |
|------------|---------------------------------------------------------------------------------------------|-----|------|------|-------|-------|
| <b>Q30</b> | We were actively involved in the decision about our child care and treatment                | 146 | 4.89 | 1.56 | 0.33  | 0.45  |
| <b>Q31</b> | We were encouraged to stay next to our child.                                               | 156 | 5.52 | 1.03 | 0.16  | 0.22  |
| <b>Q32</b> | We have confidence in the health staff.                                                     | 160 | 5.71 | 0.71 | 0.32  | 0.41  |
| <b>Q33</b> | We can stay near our child also during intensive treatments.                                | 140 | 4.58 | 1.84 | 0.14* | 0.27  |
| <b>Q34</b> | Nurses encouraged us to help them during our child care.                                    | 149 | 5.16 | 1.44 | 0.16* | 0.20  |
| <b>Q35</b> | Nurses helped us to develop an emotional attachment between our child and us.               | 157 | 5.41 | 1.18 | 0.14* | 0.26  |
| <b>Q36</b> | Nurses taught us how to take care of our newborn child.                                     | 151 | 5.43 | 1.09 | 0.15* | 0.43  |
| <b>Q37</b> | We received information about our child care before his/her transfer or discharge.          | 108 | 4.65 | 1.82 | 0.32  | 0.37  |
| <b>Q38</b> | Ward/section of NICU stay gave us a safety sensation.                                       | 161 | 5.67 | 0.77 | 0.30  | 0.27  |
| <b>Q39</b> | Our child incubator or the crib were clear.                                                 | 161 | 5.90 | 0.37 | 0.35  | 0.24  |
| <b>Q40</b> | The health staff worked in an efficiency manner.                                            | 161 | 5.75 | 0.66 | 0.43  | 0.51  |
| <b>Q41</b> | The ward/NICU section staff were on call.                                                   | 125 | 5.48 | 1.13 | 0.24  | 0.22  |
| <b>Q42</b> | The space around the incubator/crib was enough.                                             | 161 | 4.81 | 1.56 | 0.22  | 0.13* |
| <b>Q43</b> | The ward/NICU section was clean.                                                            | 161 | 5.82 | 0.51 | 0.17* | 0.11* |
| <b>Q44</b> | Ward/NICU section noises were mitigated where possible.                                     | 159 | 5.30 | 1.20 | 0.18  | 0.16  |
| <b>Q45</b> | The atmosphere in the ward/NICU section was cordial without hostilities.                    | 160 | 5.65 | 0.69 | 0.30  | 0.29  |
| <b>Q46</b> | Nurses and physician always identified themselves saying their name and their role.         | 158 | 4.34 | 1.84 | 0.23  | 0.40  |
| <b>Q47</b> | We received sympathy from physicians and nurses.                                            | 161 | 5.49 | 1.02 | 0.43  | 0.47  |
| <b>Q48</b> | The health staff worked following the hygiene rules.                                        | 160 | 5.76 | 0.73 | 0.23  | 0.43  |
| <b>Q49</b> | The health staff cared about our child and our privacy.                                     | 157 | 5.62 | 0.84 | 0.25  | 0.30  |
| <b>Q50</b> | The health staff showed respect towards our child and us.                                   | 160 | 5.74 | 0.70 | 0.31  | 0.44  |
| <b>Q51</b> | Physicians and nurses do not have usefulness conversation near our child incubator/crib.    | 153 | 5.24 | 1.43 | 0.25  | 0.37  |
| <b>Q52</b> | The atmosphere among the staff was pleasant.                                                | 162 | 5.64 | 0.77 | 0.43  | 0.49  |
| <b>Q53</b> | We were warmly welcomed by the staff.                                                       | 162 | 5.38 | 1.16 | 0.29  | 0.42  |
| <b>Q54</b> | Physicians and nurses gave the proper attention to our child and us despite their workload. | 161 | 5.50 | 0.96 | 0.37  | 0.49  |
| <b>Q55</b> | It was taken in account our culture of origin.                                              | 106 | 4.77 | 1.93 | 0.07* | 0.06* |
| <b>Q56</b> | Physicians and nurses always gave priority to our child health condition.                   | 160 | 5.79 | 0.57 | 0.36  | 0.26  |
| <b>Q57</b> | Physicians and nurses were always available to listen to us.                                | 161 | 5.50 | 0.95 | 0.34  | 0.50  |

---

*The correlations with the general vote to physicians and nurses are all significant for  $p < 0.05$  except for those indicated with \**
